# Supplementary material
Source: HighWire-hosted journal article supplement (https://bmjopen.bmj.com/content/12/11/e064641)
Supplement: inline-supplementary-material-2 [file inline-supplementary-material-2.pdf]

## Appendix

**Table S1. Administrative division of provinces in mainland China**

| Administrative division (No.) | Province                                                                                                        |
|-------------------------------|-----------------------------------------------------------------------------------------------------------------|
| Eastern provinces (11)        | Beijing, Fujian, Guangdong, Hainan, Hebei, Jiangsu, Liaoning, Shandong, Shanghai, Tianjin, Zhejiang             |
| Central provinces (8)         | Anhui, Heilongjiang, Henan, Hubei, Hunan, Jiangxi, Jilin, Shanxi                                                |
| Western provinces (12)        | Inner Mongolia, Guangxi, Chongqing, Gansu, Guizhou, Ningxia, Qinghai, Shaanxi, Sichuan, Tibet, Xinjiang, Yunnan |

**Table S2. IHME standard age weight**

| Age group | Population percentage |
|-----------|-----------------------|
| <5        | 7.2%                  |
| 5–9       | 8.7%                  |
| 10–14     | 8.4%                  |
| 15–19     | 8.1%                  |
| 20–24     | 7.8%                  |
| 25–29     | 7.6%                  |
| 30–34     | 7.2%                  |
| 35–39     | 6.9%                  |
| 40–44     | 6.4%                  |
| 45–49     | 5.8%                  |
| 50–54     | 5.3%                  |
| 55–59     | 4.7%                  |
| 60–64     | 4.1%                  |
| 65–69     | 3.4%                  |
| 70 +      | 8.6%                  |

### ARD burden-adjusted age calculation

First, we identified the ARD burden-adjusted age of China by comparing the national average burden rate with its burden rates by age group. We selected the two five-year age groups with the closest burden rate as the national average and calculated the national average age by assuming a linear increase in the ARD burden within each five-year age group. For example, the age-related disease burden of China was 12637.2 DALYs per 100,000 population in 2016, closest to burden rates for the age group of 45–49 (9316.3) and 50–54 (14163.7). Hence, the national age was calculated as:  $45 + 12637.2 / ((9316.3 + 14163.7) / 10) = 50.38$ .

Second, we calculated the ARD burden-adjusted age of each province by dividing the provincial age-related disease burden rate by the unit share of the national average burden rate per age. The unit share of the national average burden rate per age was calculated by dividing the national average burden rate by the national equivalent age. For example, the age-related disease burden of Shanghai was 8,127.4 DALYs per 100,000 population. Hence, Shanghai's ARD burden-adjusted age was calculated as:  $8,127.4 / (12637.2 / 50.38) = 32.40$ .

### Regression model

$$Y_{it} = \alpha + \beta_0 \text{healthexp}_{it} + \beta_1 \text{healthw}_{it} + \beta_2 X_{it} + \beta_3 D_t + \eta_i + \varepsilon_{it},$$

where  $Y_{it}$  is the age-standardised age-related disease burden of Province  $i$  in Year  $t$ ,  $\beta_0$  is the coefficient of interest,  $\text{healthexp}_{it}$  is the total health expenditures per capita, and  $\text{healthw}_{it}$  is the total health professional density, licensed doctor density, or licensed nurse density (per 1,000 population) of the Province  $i$  in Year  $t$  (three separate models).  $X_{it}$  is the set of covariates controlled in the model, including GDP per capita, education, the proportion of females, the proportion of people living in urban areas, and the urban-rural health workforce density ratio.  $D_t$  represents the time dummies,  $\eta_i$  the province fixed effects, and  $\varepsilon_{it}$  is the error term. All variables are in log form except for the time dummies.

We also assessed the correlation between 1) the total health expenditures per capita and health workforce density and 2) the rural/urban ratio in health workforce density and the proportion of rural/urban population to check multicollinearity before and after controlling for covariates, including GDP per capita, sex and education. The results are presented below in Table S3 and Table S4.

**Table S3. Regression model results: assessing correlation between health workforce density and total health expenditures per capita**

| Independent Variables          | Model 1          |         | Model 2          |         | Model 3          |         | Model 4          |         | Model 5          |         | Model 6          |         |
|--------------------------------|------------------|---------|------------------|---------|------------------|---------|------------------|---------|------------------|---------|------------------|---------|
|                                | Coef ( $\beta$ ) | P value | Coef ( $\beta$ ) | P value | Coef ( $\beta$ ) | P value | Coef ( $\beta$ ) | P value | Coef ( $\beta$ ) | P value | Coef ( $\beta$ ) | P value |
| Health prof density            | 0.09             | 0.10    | -0.04            | 0.34    | ..               | ..      | ..               | ..      | ..               | ..      | ..               | ..      |
| Licensed doc density           | ..               | ..      | ..               | ..      | 0.11             | 0.06    | 0.01             | 0.89    | ..               | ..      | ..               | ..      |
| Licensed nurse density         | ..               | ..      | ..               | ..      | ..               | ..      | ..               | ..      | 0.08             | 0.09    | -0.02            | 0.51    |
| GDP per capita                 | ..               | ..      | 0.37             | <0.01   | ..               | ..      | 0.33             | <0.01   | ..               | ..      | 0.36             | <0.01   |
| Female (%)                     | ..               | ..      | 0.08             | 0.32    | ..               | ..      | 0.08             | 0.35    | ..               | ..      | 0.08             | 0.33    |
| $\geq$ junior mid sch educ (%) | ..               | ..      | 0.08             | 0.50    | ..               | ..      | 0.06             | 0.58    | ..               | ..      | 0.08             | 0.50    |
| adj. $R^2$                     | 0.96             | ..      | 0.94             | ..      | 0.96             | ..      | 0.94             | ..      | 0.96             | ..      | 0.94             | ..      |

Note:

Model 1: Total health professional density as independent variable, not controlling for covariates except for time dummies

Model 2: Total health professional density as independent variable, controlling for covariates except for time dummies

Model 3: Licensed doctor density as independent variable, not controlling for covariates except for time dummies

Model 4: Licensed doctor density as independent variable, controlling for covariates except for time dummies

Model 5: Licensed nurse density as independent variable, not controlling for covariates except for time dummies

Model 6: Licensed nurse density as independent variable, controlling for covariates except for time dummies

**Table S4. Regression model results: assessing correlation between urban residency and urban-rural ratio in health workforce density**

| Independent Variables                | Model 1          |         | Model 2          |         |
|--------------------------------------|------------------|---------|------------------|---------|
|                                      | Coef ( $\beta$ ) | P value | Coef ( $\beta$ ) | P value |
| Population living in urban areas (%) | -0.44            | 0.23    | -0.06            | 0.90    |
| GDP per capita                       | ..               | ..      | -0.01            | 0.95    |
| Female (%)                           | ..               | ..      | -0.19            | 0.02    |
| $\geq$ junior mid sch educ (%)       | ..               | ..      | -0.28            | 0.11    |
| adj. $R^2$                           | 0.84             | ..      | 0.94             | ..      |

Note:

Model 1: Population living in urban areas as independent variable, not controlling for covariates except for time dummies

Model 2: Population living in urban areas as independent variable, controlling for covariates except for time dummies

Table S5. Selected statistics of the variables in the regression model, 2010 and 2016

| Variables    | Health expenditures per capita (CNY)* |        | Total health professionals density (per 1,000 population) |      | Urban-rural ratio in total health professionals density |      | GDP per capita (CNY)* |          | Living in urban areas (%) |       | Female (%) |       | Received at least middle school education (%) |       |
|--------------|---------------------------------------|--------|-----------------------------------------------------------|------|---------------------------------------------------------|------|-----------------------|----------|---------------------------|-------|------------|-------|-----------------------------------------------|-------|
|              | 2010                                  | 2016   | 2010                                                      | 2016 | 2010                                                    | 2016 | 2010                  | 2016     | 2010                      | 2016  | 2010       | 2016  | 2010                                          | 2016  |
| Province     | 2010                                  | 2016   | 2010                                                      | 2016 | 2010                                                    | 2016 | 2010                  | 2016     | 2010                      | 2016  | 2010       | 2016  | 2010                                          | 2016  |
| Anhui        | 1210.5                                | 2652.2 | 3.1                                                       | 4.7  | 2.4                                                     | 2.3  | 20888.0               | 39561.0  | 44.8%                     | 52.0% | 49.2%      | 48.7% | 62.8%                                         | 65.5% |
| Beijing      | 4147.2                                | 9429.7 | 13.6                                                      | 10.8 | 1.9                                                     | ..   | 73856.0               | 118198.0 | 86.2%                     | 86.5% | 48.4%      | 48.6% | 87.6%                                         | 88.6% |
| Chongqing    | 1501.0                                | 3492.2 | 3.4                                                       | 5.9  | 1.4                                                     | 2.0  | 27596.0               | 58502.0  | 55.0%                     | 62.6% | 49.4%      | 49.2% | 61.0%                                         | 64.1% |
| Fujian       | 1280.1                                | 3226.8 | 4.1                                                       | 5.7  | 2.8                                                     | 2.5  | 40025.0               | 74707.0  | 58.1%                     | 63.6% | 48.6%      | 49.1% | 63.0%                                         | 61.7% |
| Gansu        | 1153.9                                | 2889.2 | 3.7                                                       | 5.2  | 2.0                                                     | 2.2  | 16113.0               | 27643.0  | 37.2%                     | 44.7% | 48.9%      | 49.3% | 56.5%                                         | 57.9% |
| Guangdong    | 1445.9                                | 3812.5 | 5.3                                                       | 6.0  | 3.2                                                     | 3.2  | 44736.0               | 74016.0  | 66.5%                     | 69.2% | 47.8%      | 46.9% | 73.2%                                         | 74.3% |
| Guangxi      | 1116.9                                | 2557.0 | 3.6                                                       | 6.0  | 2.2                                                     | 2.2  | 20219.0               | 38027.0  | 41.8%                     | 48.1% | 48.0%      | 48.0% | 62.5%                                         | 67.4% |
| Guizhou      | 946.6                                 | 2472.4 | 2.5                                                       | 5.8  | 4.2                                                     | 3.9  | 13119.0               | 33246.0  | 35.0%                     | 44.2% | 48.3%      | 48.4% | 48.8%                                         | 54.6% |
| Hainan       | 1193.0                                | 3306.8 | 4.4                                                       | 6.3  | 2.3                                                     | 3.3  | 23831.0               | 44347.0  | 50.5%                     | 56.8% | 47.4%      | 47.3% | 72.1%                                         | 73.0% |
| Hebei        | 1253.8                                | 2710.6 | 4.0                                                       | 5.3  | 3.2                                                     | 2.7  | 28668.0               | 43062.0  | 45.6%                     | 53.3% | 49.3%      | 48.9% | 69.9%                                         | 69.7% |
| Heilongjiang | 1580.2                                | 3133.4 | 5.0                                                       | 5.8  | 2.3                                                     | 2.3  | 27076.0               | 40432.0  | 56.5%                     | 59.2% | 49.2%      | 49.5% | 73.0%                                         | 73.3% |
| Henan        | 1134.0                                | 2594.0 | 3.5                                                       | 5.7  | 3.0                                                     | 3.2  | 24446.0               | 42575.0  | 40.6%                     | 48.5% | 49.5%      | 49.0% | 68.2%                                         | 69.8% |
| Hubei        | 1191.1                                | 3270.6 | 4.2                                                       | 6.5  | 2.1                                                     | 2.2  | 27906.0               | 55665.0  | 51.8%                     | 58.1% | 48.6%      | 48.7% | 69.8%                                         | 70.5% |
| Hunan        | 1042.1                                | 2821.0 | 3.8                                                       | 5.8  | 2.9                                                     | 2.9  | 24719.0               | 46382.0  | 45.1%                     | 52.8% | 48.6%      | 48.9% | 67.1%                                         | 71.2% |

|                |        |         |     |     |     |     |         |          |       |       |       |       |       |       |
|----------------|--------|---------|-----|-----|-----|-----|---------|----------|-------|-------|-------|-------|-------|-------|
| Inner Mongolia | 1767.5 | 3599.7  | 5.1 | 6.8 | 2.7 | 2.6 | 47347.0 | 72064.0  | 56.6% | 61.2% | 48.1% | 49.5% | 69.9% | 73.3% |
| Jiangsu        | 1566.0 | 4200.2  | 4.4 | 6.5 | 2.0 | 2.1 | 52840.0 | 96887.0  | 61.9% | 67.7% | 49.6% | 49.6% | 70.9% | 71.5% |
| Jiangxi        | 992.0  | 2374.8  | 5.1 | 6.1 | 1.8 | 2.1 | 21253.0 | 40400.0  | 45.7% | 53.1% | 48.2% | 48.0% | 65.6% | 64.1% |
| Jilin          | 1653.9 | 3501.19 | 5.5 | 6.3 | 2.5 | 2.9 | 31599.0 | 53868.0  | 53.4% | 56.0% | 49.3% | 49.2% | 69.8% | 73.6% |
| Liaoning       | 1765.9 | 3390.9  | 4.7 | 6.6 | 3.0 | 2.6 | 42355.0 | 50791.0  | 64.0% | 67.4% | 49.4% | 49.5% | 75.5% | 78.3% |
| Ningxia        | 1190.1 | 3730.5  | 4.5 | 6.2 | 4.4 | 5.4 | 26860.0 | 47194.0  | 49.8% | 56.3% | 48.8% | 48.4% | 61.3% | 66.5% |
| Qinghai        | 1472.0 | 4043.1  | 4.7 | 7.6 | 2.0 | 2.0 | 24115.0 | 43531.0  | 46.3% | 51.6% | 48.2% | 48.6% | 49.8% | 51.8% |
| Shaanxi        | 2040.7 | 3535.7  | 4.7 | 6.5 | 1.7 | 2.2 | 27133.0 | 51015.0  | 47.3% | 55.3% | 48.3% | 49.5% | 69.8% | 71.5% |
| Shandong       | 1403.1 | 3372.7  | 9.7 | 7.4 | 1.3 | 1.6 | 41106.0 | 68733.0  | 50.9% | 59.0% | 49.4% | 49.0% | 67.5% | 69.0% |
| Shanghai       | 2828.1 | 7596.0  | 5.6 | 6.1 | 2.6 | 3.2 | 76074.0 | 116562.0 | 89.3% | 87.9% | 48.5% | 48.6% | 83.6% | 83.5% |
| Shanxi         | 1297.5 | 2650.3  | 3.4 | 4.8 | 2.7 | 3.0 | 26283.0 | 35532.0  | 49.7% | 56.2% | 48.6% | 48.5% | 74.1% | 77.5% |
| Sichuan        | 1019.1 | 3238.6  | 3.6 | 6.0 | 2.0 | 2.0 | 21182.0 | 40003.0  | 41.8% | 49.2% | 49.2% | 50.1% | 57.2% | 58.9% |
| Tianjin        | 2737.3 | 5294.2  | 7.1 | 6.1 | 1.4 | 1.1 | 72994.0 | 115053.0 | 80.5% | 82.9% | 46.6% | 46.6% | 80.5% | 82.0% |
| Tibet          | 1472.0 | 3780.9  | 3.4 | 4.5 | 4.9 | 4.1 | 17027.0 | 35184.0  | 22.8% | 29.6% | 48.6% | 49.5% | 26.4% | 29.6% |
| Xinjiang       | 1676.8 | 4012.9  | 5.7 | 7.1 | 3.2 | 2.4 | 25034.0 | 40564.0  | 43.5% | 48.3% | 48.7% | 48.9% | 66.1% | 65.5% |
| Yunnan         | 1107.2 | 2754.1  | 3.2 | 5.2 | 3.2 | 3.3 | 15752.0 | 31093.0  | 36.8% | 45.0% | 48.1% | 49.5% | 48.3% | 52.5% |
| Zhejiang       | 2099.0 | 4603.8  | 6.1 | 7.7 | 1.8 | 1.8 | 51711.0 | 84916.0  | 62.3% | 67.0% | 48.6% | 47.9% | 64.7% | 66.0% |

\*CNY=Chinese Yuan, exchange rate: 1USD≈6.37CNY (Dec 3, 2020)

Data source: National Statistical Yearbook of China (2011, 2017) and National Health Statistical Yearbook of China (2011,2017)
